# Supplementary material for: Embedding CoO nanoparticles in a yolk–shell N-doped porous carbon support for ultrahigh and stable lithium storage
Source: Royal Society of Chemistry journal article supplement (doi:10.1039/c8ta11007g), 2019-01-01
Supplement: c8ta11007g1.pdf [file c8ta11007g1.pdf]

Electronic Supplementary Material (ESI) for Journal of Materials Chemistry A.  
This journal is © The Royal Society of Chemistry 2018

**Embedding CoO nanoparticles in yolk-shell N-doped porous carbon support for ultrahigh and stable lithium storage**

Shuhai Wang,<sup>‡ab</sup> Jun Teng,<sup>‡a</sup> Yanyu Xie,<sup>a</sup> Zhang-Wen Wei,<sup>a</sup> Yanan Fan,<sup>a</sup> Ji-Jun Jiang,<sup>a</sup> Hai-Ping Wang,<sup>a</sup> Heguang Liu,<sup>c</sup> Dawei Wang,<sup>\*a</sup> and Cheng-Yong Su<sup>a</sup>

<sup>a</sup> Lehn Institute of Functional Materials, School of Chemistry, Sun Yat-Sen University, Guangzhou 510275, China.

E-mail: wdawei@mail.sysu.edu.cn

<sup>b</sup> School of Chemistry and Chemical Engineering, Linyi University, Linyi 276000, P. R. China

<sup>c</sup> School of Materials Science and Engineering, Xi'an University of Technology, Xi'an, 710048, China

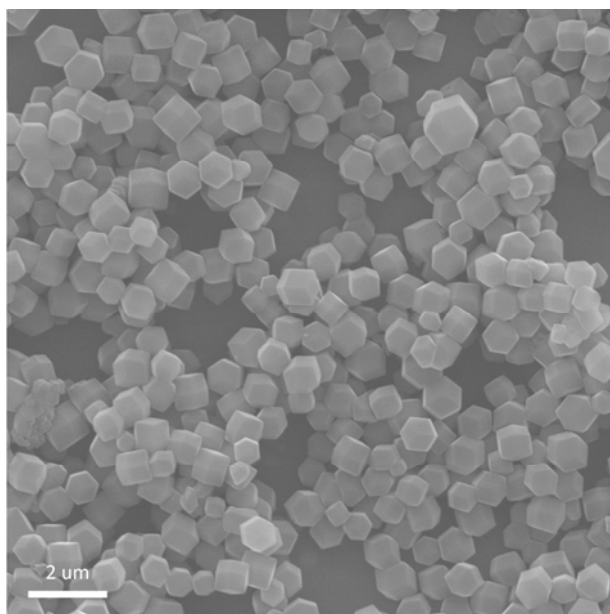

**Figure S1.** SEM image of the as-synthesized ZIF-67 nanocrystals.

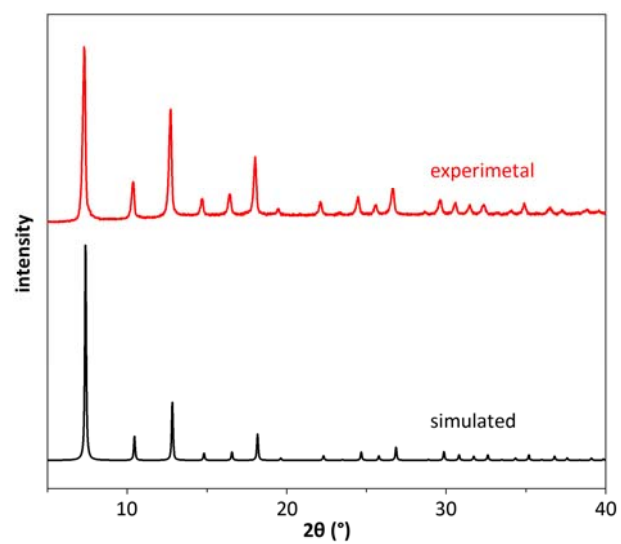

**Figure S2.** PXRD patterns of ZIF-67 nanocrystals.

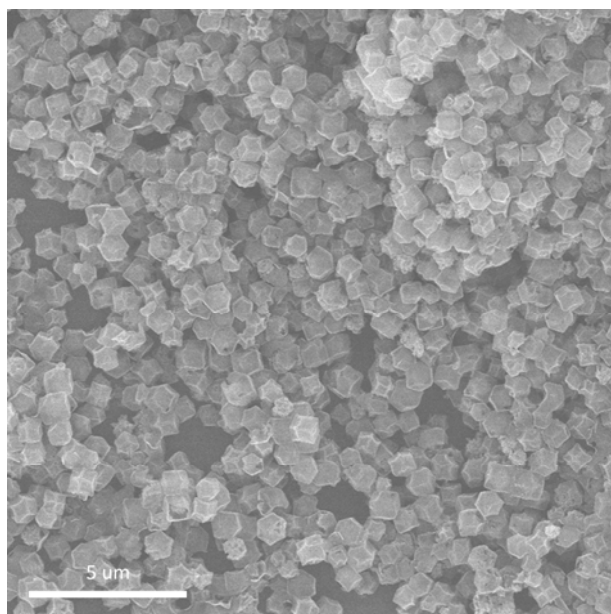

**Figure S3.** SEM image of the as-synthesized CoO/C YSNSs.

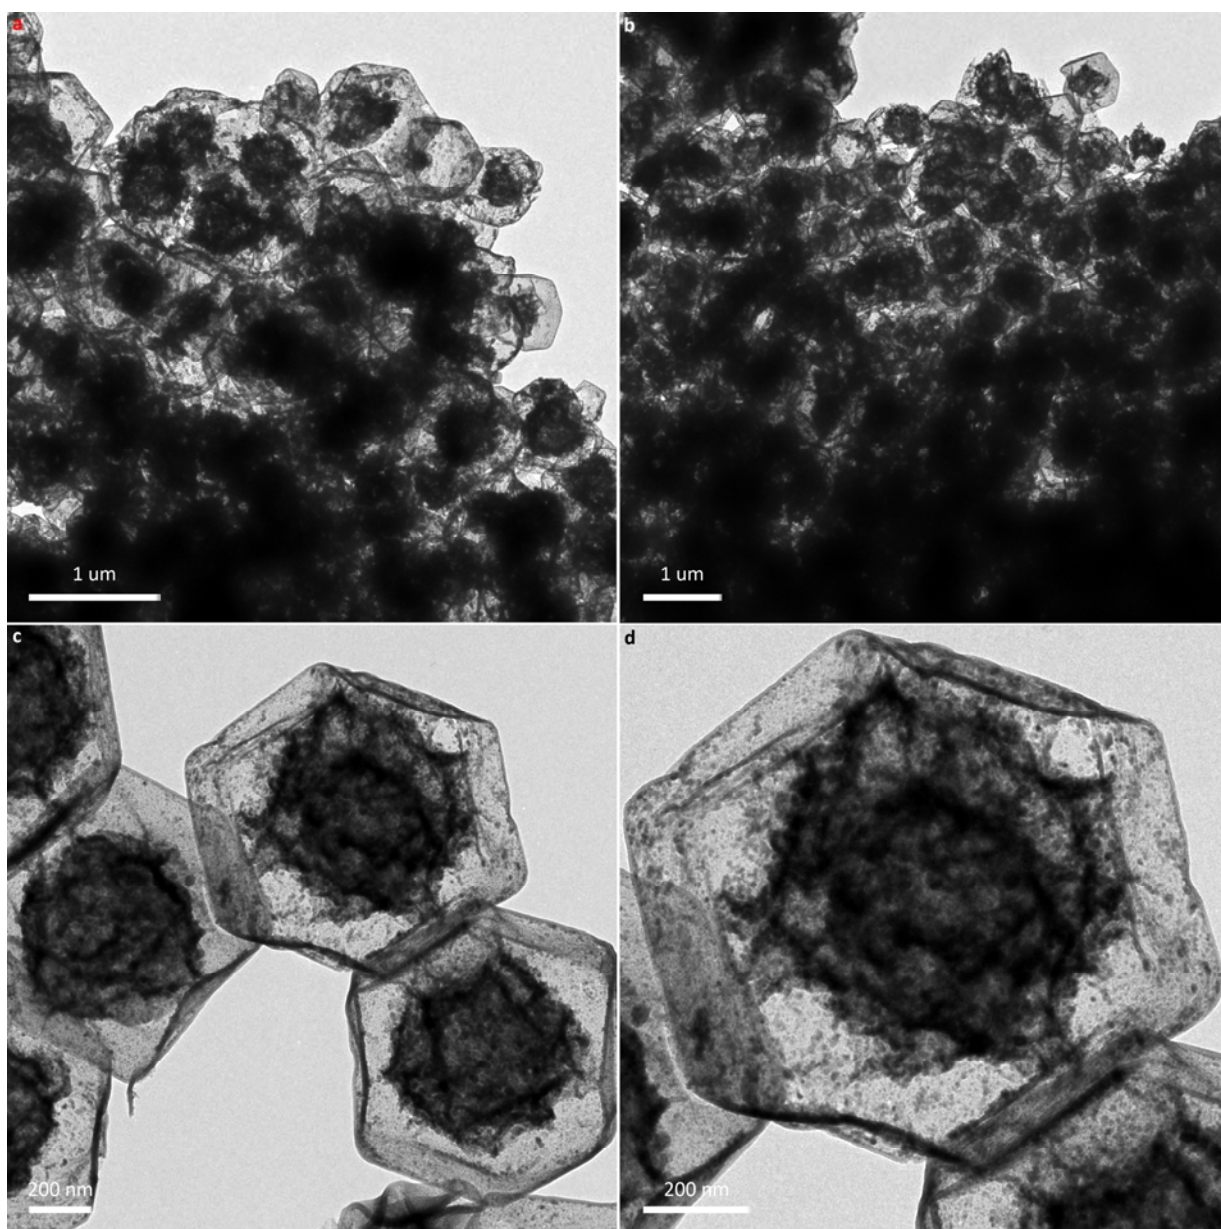

**Figure S4.** TEM images of the as-synthesized CoO/C YSNSs at different magnification.

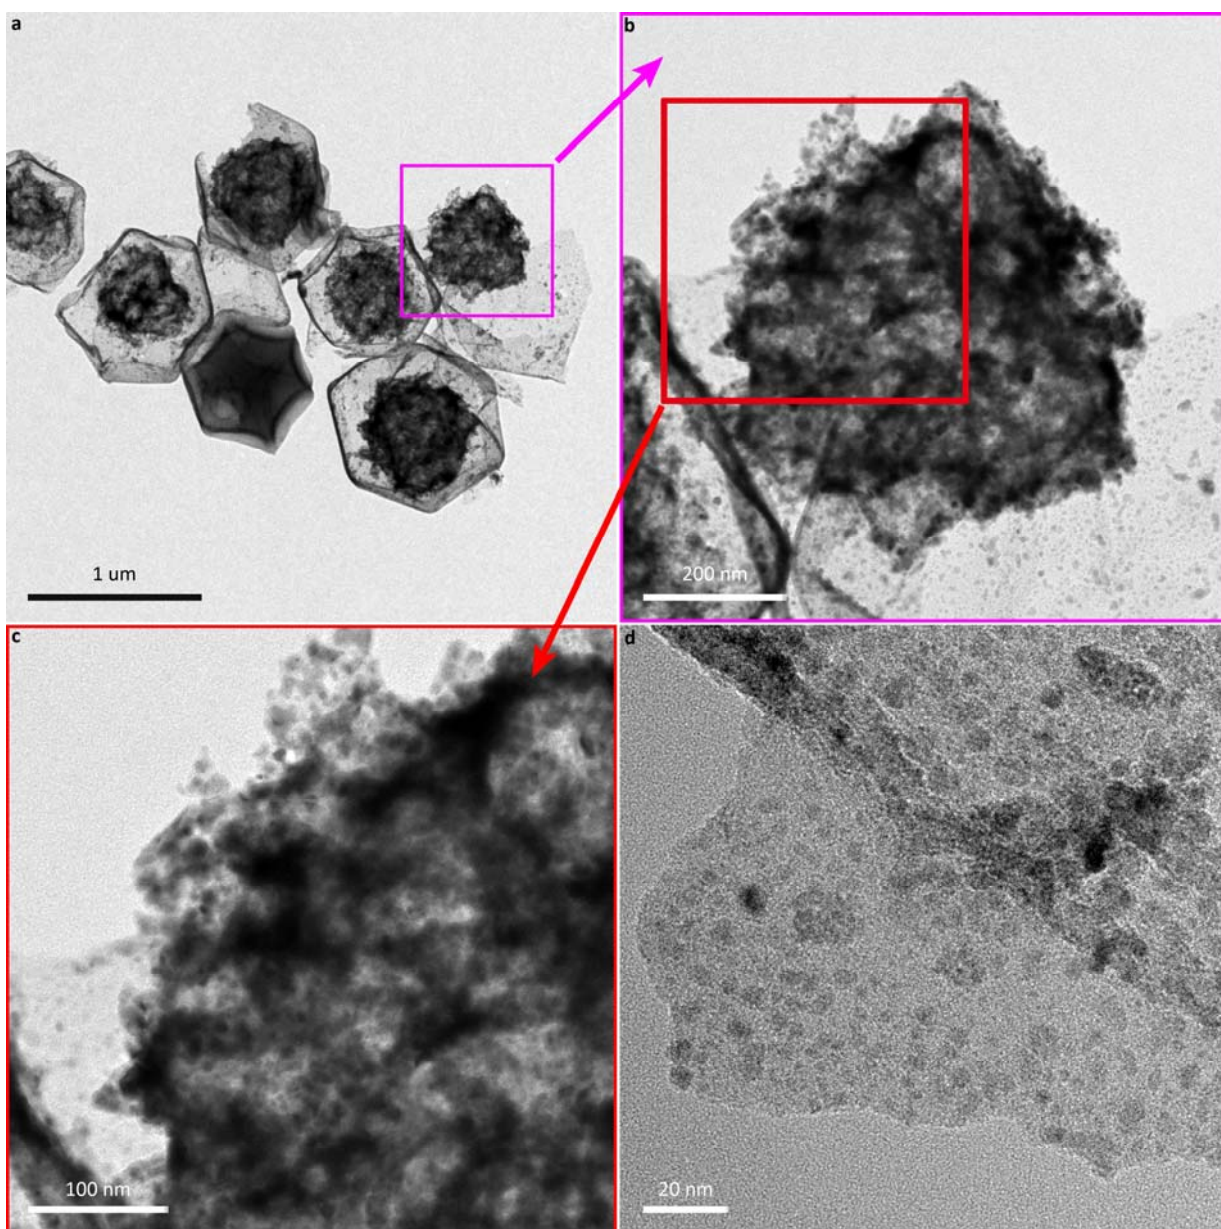

**Figure S5.** (a, b) TEM images of cracked CoO/C YSNSs. (c,d) TEM images of (c) the yolk and (d) the shell of cracked CoO/C YSNSs.

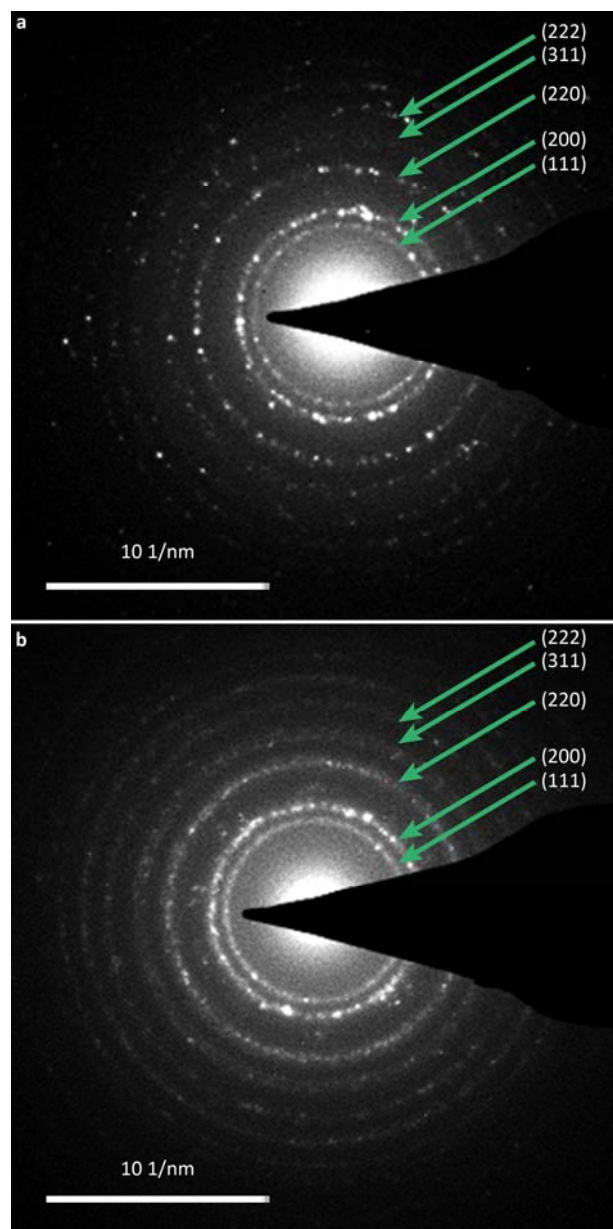

**Figure S6.** SAED patterns of (a) the outer shell and (b) inner yolk of cracked CoO/C YSNS.

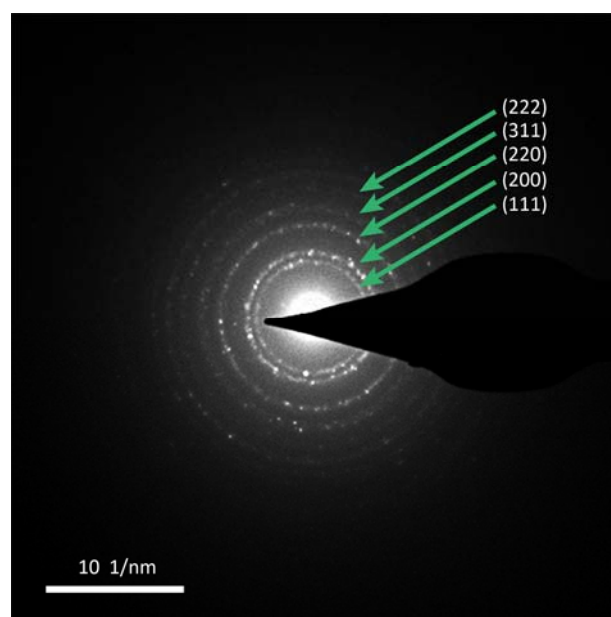

**Figure S7.** SAED pattern of single CoO/C YSNS, which is in excellent agreement with the SAED patterns of the outer shell or inner yolk of cracked CoO/C YSNS (shown in Figure S6a and S6b, respectively). All these three SAED patterns can be assigned to face-centered cubic CoO crystals (JCPDS No. 43-1004), suggesting that the nanoparticles are CoO.



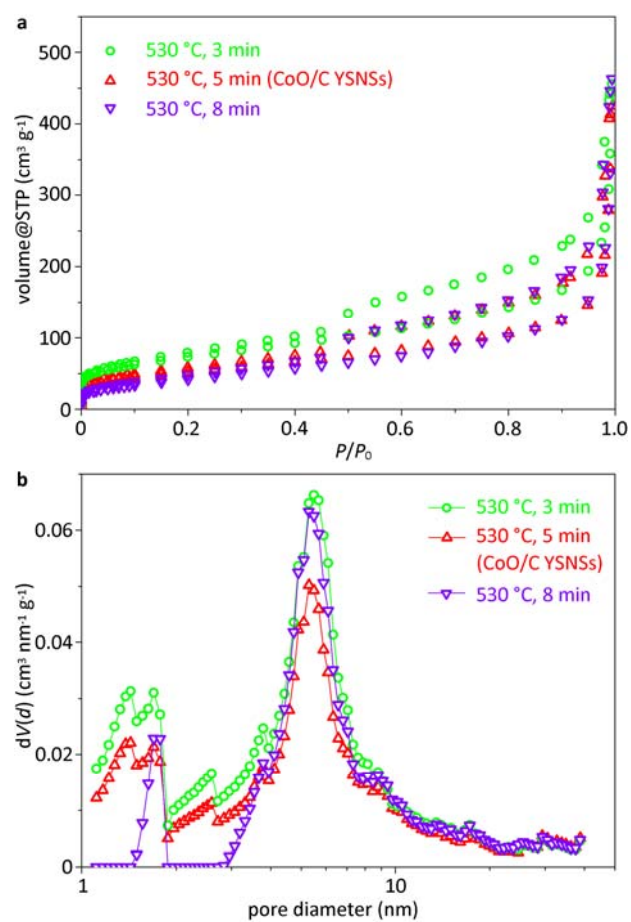

**Figure S8.** (a) N<sub>2</sub> sorption isotherms and (b) pore size distribution of the products synthesized by the controlled pyrolysis of ZIF-67 under different conditions.

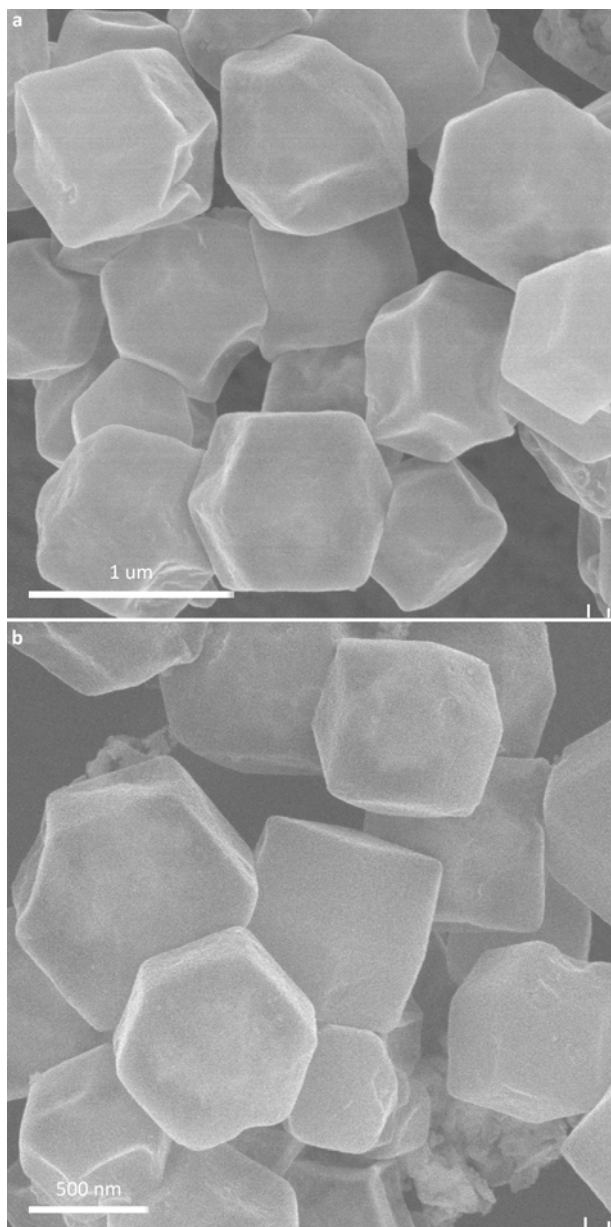

**Figure S9.** SEM images of the CoO/C YSNSs synthesized through the pyrolysis of ZIF-67 nanocrystals at 530 °C for 5 min. The Ar flow rate was 50 mL min<sup>-1</sup> and the temperature was raised to 530 °C at a ramp rate of 1 °C min<sup>-1</sup>.

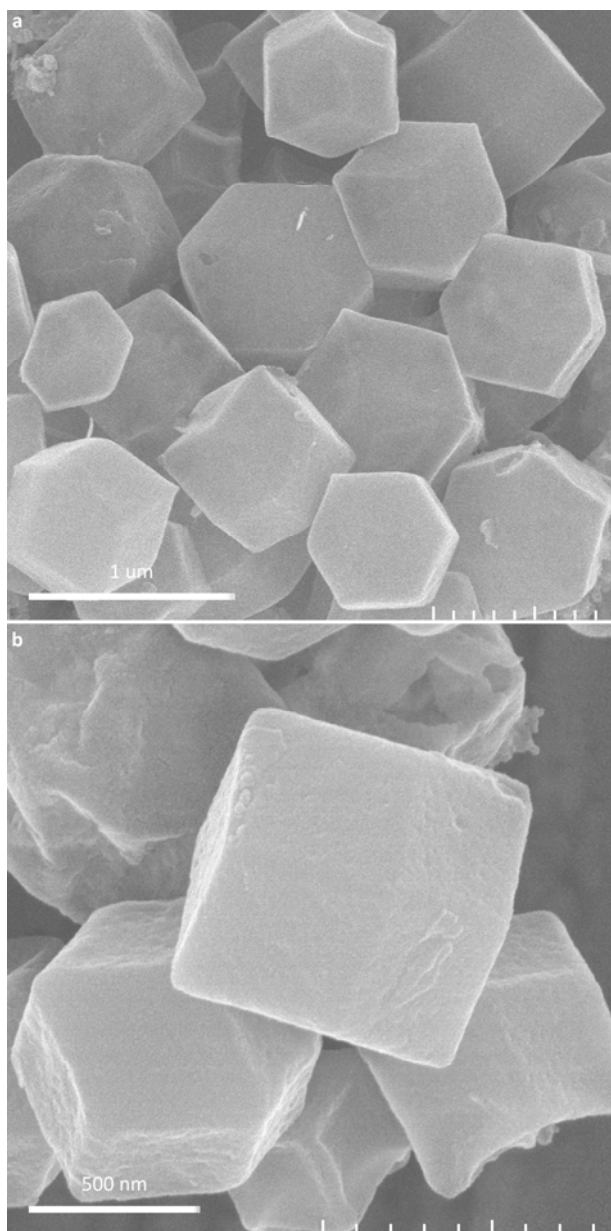

**Figure S10.** SEM images of the samples synthesized through the pyrolysis of ZIF-67 nanocrystals at 530 °C for 3 min. The Ar flow rate was 50 mL min<sup>-1</sup> and the temperature was raised to 530 °C at a ramp rate of 1 °C min<sup>-1</sup>.

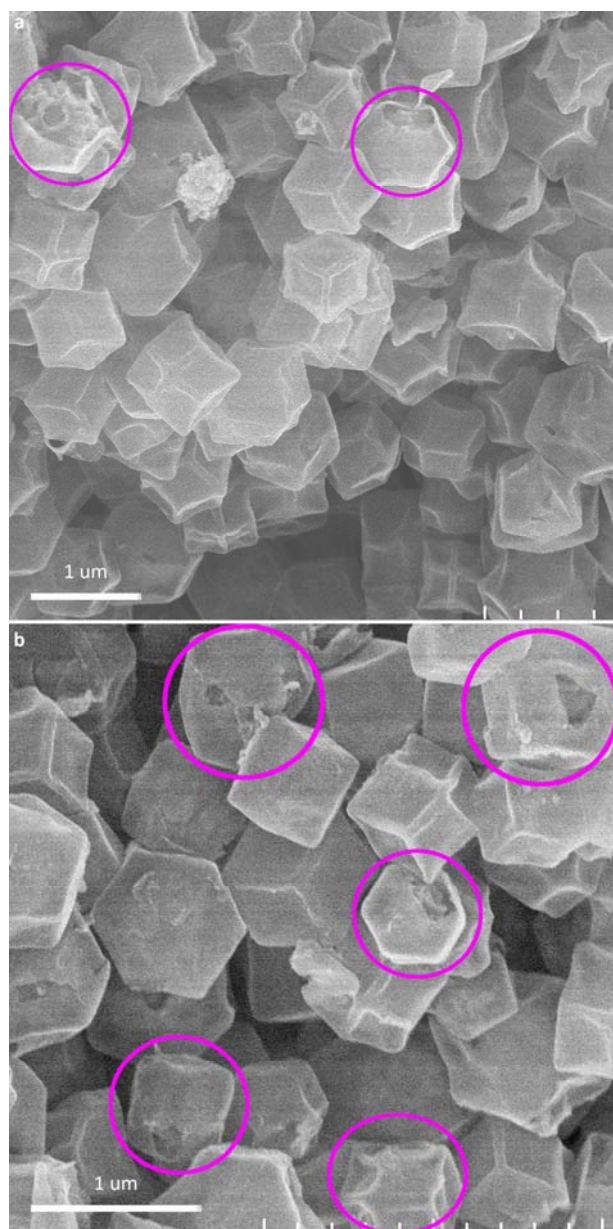

**Figure S11.** SEM images of cracked samples, in which the cracks (indicated with magenta circles) were introduced by the grinding and subsequent ultrasonication of samples synthesized through the pyrolysis of ZIF-67 nanocrystals at 530 °C for 3 min. SEM images of the samples taken prior to crack treatment are shown in Figure S10.

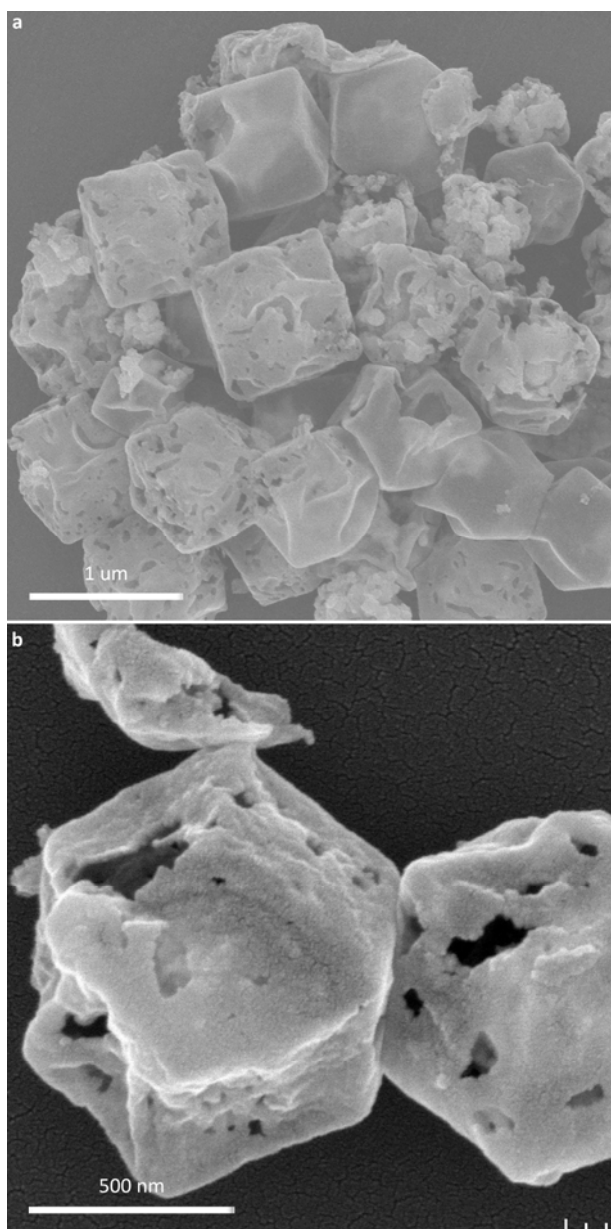

**Figure S12.** SEM images of the samples synthesized through the pyrolysis of ZIF-67 nanocrystals at 530 °C for 8 min. The Ar flow rate was 50 mL min<sup>-1</sup> and the temperature was raised to 530 °C at a ramp rate of 1 °C min<sup>-1</sup>.

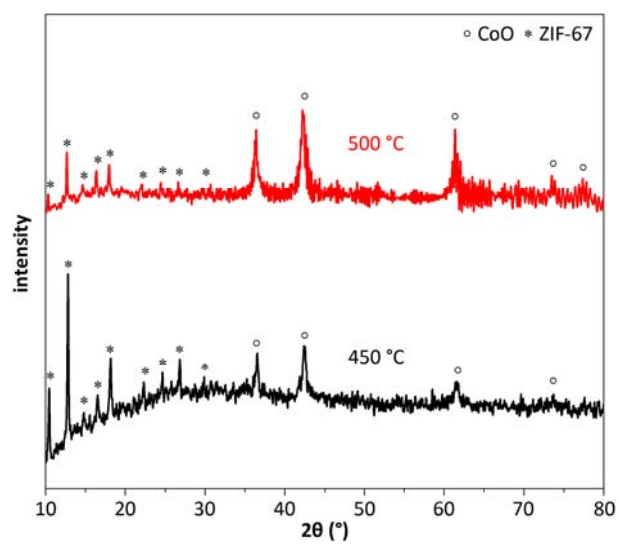

**Figure S13.** PXRD patterns of samples collected after heating ZIF-67 nanocrystals to (a) 450 and (b) 500 °C, respectively.

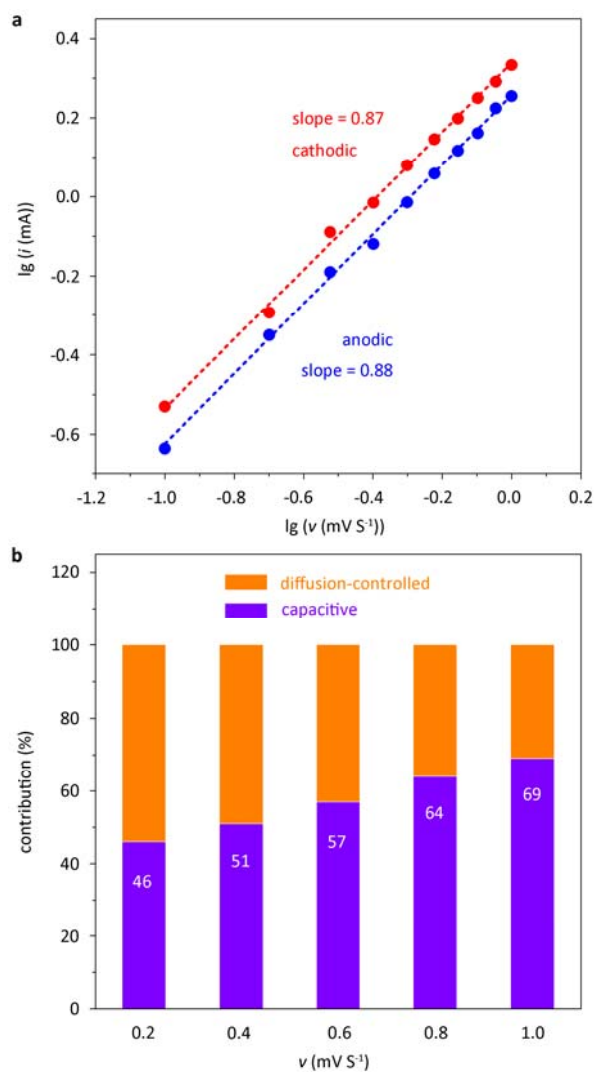

**Figure S14.** Kinetics analysis of the lithium storage behavior of CoO/C YSNSs. (a) Dependence of the cathodic/anodic peak current ( $i$ ) on the sweep rate ( $\nu$ ) at the log scale. (b) Normalized contribution of the capacitance and diffusion at various sweep rates.

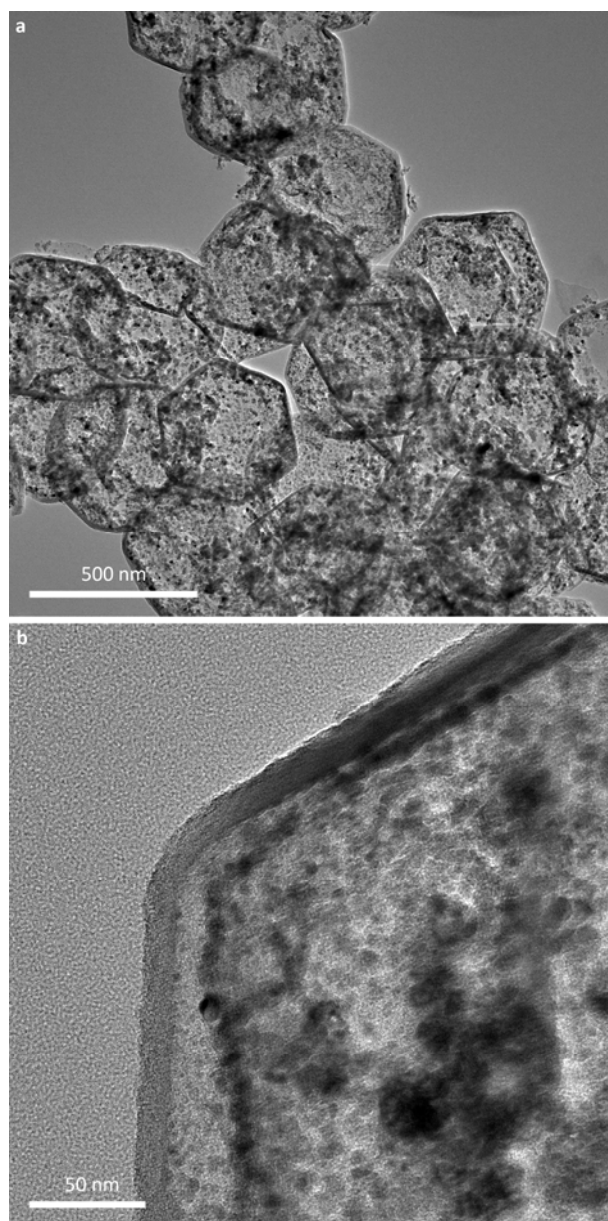

**Figure S15.** TEM images at (a) low and (b) high magnification of the conventional CoO@C YSNSs.



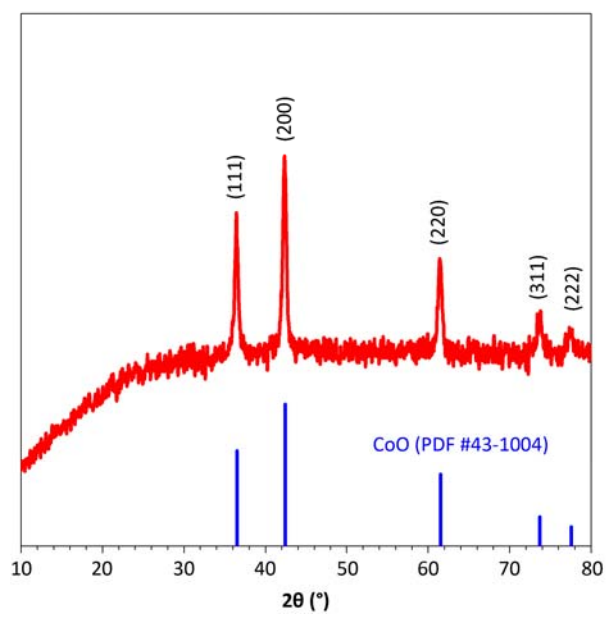

**Figure S16.** PXRD pattern of the conventional CoO@C YSNSs.

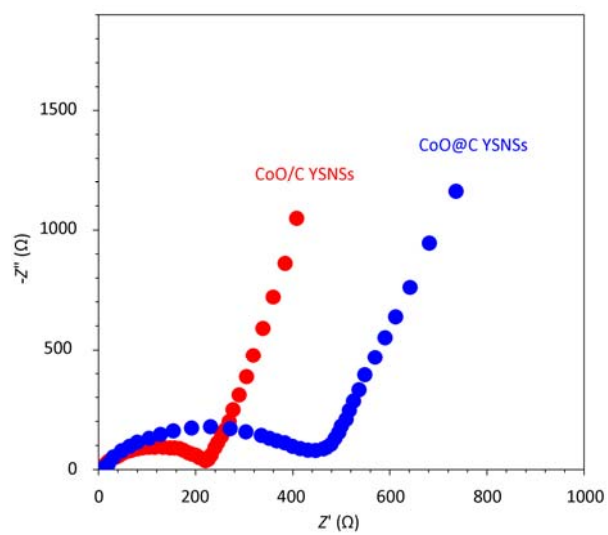

**Figure S17.** Electrochemical impedance spectra of the CoO/C YSNSs and conventional CoO@C YSNSs.

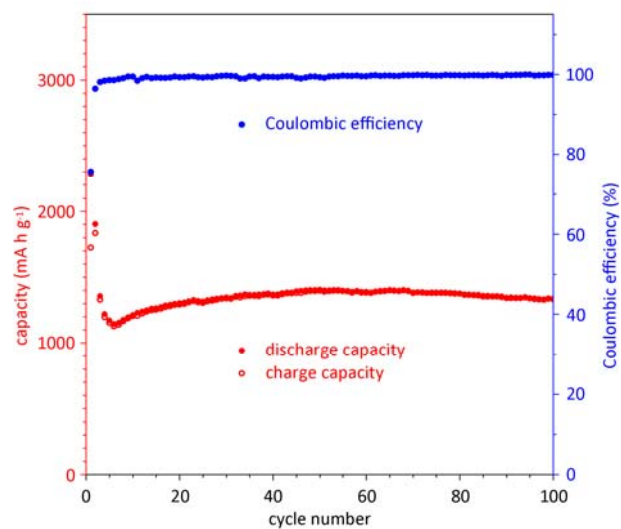

**Figure S18.** (a) Specific capacities and (b) Coulombic efficiency of the conventional CoO@C YSNSs at a current density of 100 mA g<sup>-1</sup>.

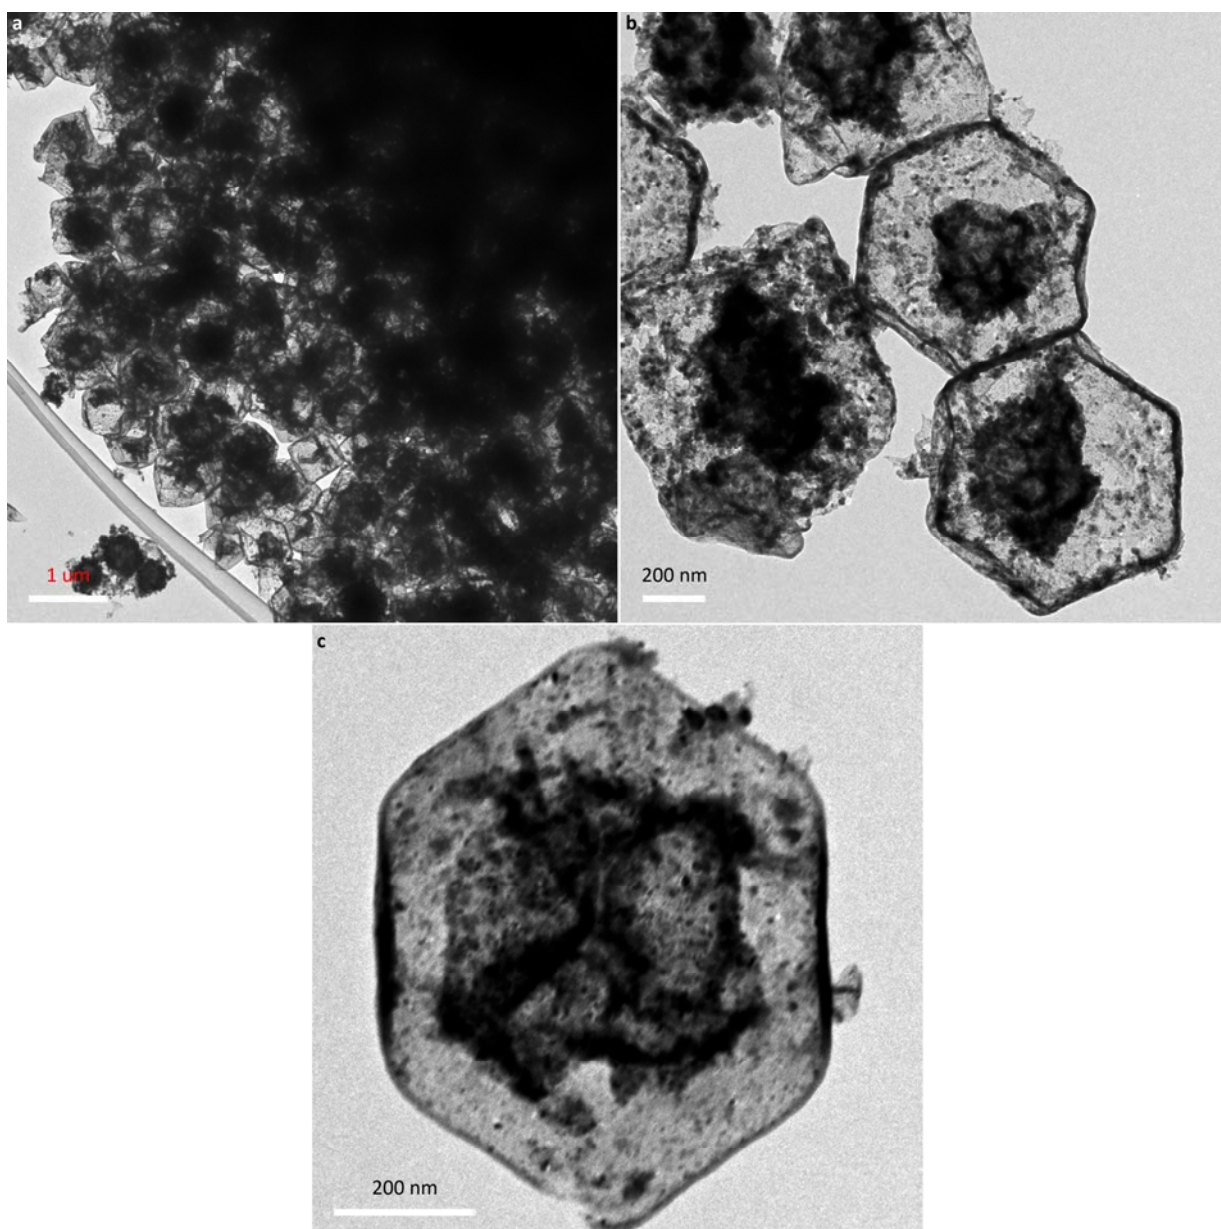

**Figure S19.** TEM images of CoO/C YSNSs after 1000 charge-discharge cycles at a current density of  $100 \text{ mA g}^{-1}$ .

**Table S1.** Lithium storage capacity and stability of representative high-performance cobalt oxides (CoO and Co<sub>3</sub>O<sub>4</sub>) based anode materials for lithium-ion batteries.

| Samples                                      | Procedure       | Capacity at low current density (mAh g <sup>-1</sup> /mA g <sup>-1</sup> ) | Capacity at high current density (mAh g <sup>-1</sup> /mA g <sup>-1</sup> ) | Cycling performance (mAh g <sup>-1</sup> /mA g <sup>-1</sup> /cycle) | Reference                                            |
|----------------------------------------------|-----------------|----------------------------------------------------------------------------|-----------------------------------------------------------------------------|----------------------------------------------------------------------|------------------------------------------------------|
| CoO nanowire clusters                        | Multistep       | 1516/716                                                                   | 1331/3580                                                                   | 1249/0.716/50                                                        | <i>Adv Funct Mater</i> 2015 <sup>S1</sup>            |
| CoO/NC                                       | Multistep       | 1200/89                                                                    | 533/8900                                                                    | 1300/89/150                                                          | <i>J Mater Chem A</i> 2017 <sup>S2</sup>             |
| CoO@C                                        | Multistep       | 866/100                                                                    | 400/5000                                                                    | 991/200/300                                                          | <i>Adv Energy Mater</i> 2018 <sup>S3</sup>           |
| CoO/NC                                       | One-step        | 1383/100                                                                   | 382/7140                                                                    | 1383/100/200                                                         | <i>Small</i> 2016 <sup>S4</sup>                      |
| CoO/Co-C cuboids                             | Multistep       | 1050/100                                                                   | 195/20000                                                                   | 580/1000/2000                                                        | <i>J Mater Chem A</i> 2016 <sup>S5</sup>             |
| CoO@BNG nanotubes                            | Multistep       | 1554/100                                                                   | 410/1750                                                                    | 394/480/1750                                                         | <i>Adv Mater</i> 2018 <sup>S6</sup>                  |
| CoO/graphene                                 | Multistep       | 720/100                                                                    | 297/5000                                                                    | 707/1000/1000                                                        | <i>J Power Sources</i> 2014 <sup>S7</sup>            |
| CoO/graphene/carbon                          | Multistep       | 1030/100                                                                   | 400/2000                                                                    | 690/500/352                                                          | <i>J Mater Chem A</i> 2014 <sup>S8</sup>             |
| CoO/graphene                                 | Multistep       | 640/100                                                                    | 170/20000                                                                   | 604/1000/5000                                                        | <i>Adv Funct Mater</i> 2013 <sup>S9</sup>            |
| CoO@RGO                                      | Multistep       | 950/198                                                                    | 750/8900                                                                    | 890/880/400                                                          | <i>Adv Funct Mater</i> 2016 <sup>S10</sup>           |
| CoO@C-Ni                                     | Multistep       | 1193/200                                                                   | 536/4000                                                                    | 1120/1000/600                                                        | <i>Nano Energy</i> 2014 <sup>S11</sup>               |
| Co <sub>3</sub> O <sub>4</sub> nanoparticles | Multistep       | 1000/100                                                                   | 870/1000                                                                    | 600/1000/500                                                         | <i>J Power Sources</i> 2015 <sup>S12</sup>           |
| Co <sub>3</sub> O <sub>4</sub> microframes   | Multistep       | 1092/100                                                                   | 620/8000                                                                    | 757/5000/4000                                                        | <i>Chem Commun</i> 2016 <sup>S13</sup>               |
| Co <sub>3</sub> O <sub>4</sub> networks      | Multistep       | 1033/100                                                                   | 758/2000                                                                    | 485/5000/700                                                         | <i>Adv Funct Mater</i> 2017 <sup>S14</sup>           |
| Co <sub>3</sub> O <sub>4</sub> nanosheets    | Multistep       | 1477/100                                                                   | 775/1000                                                                    | 775/1000/200                                                         | <i>Inorg Chem Front</i> 2018 <sup>S15</sup>          |
| Co <sub>3</sub> O <sub>4</sub> /C nanotubes  | Multistep       | 1160/500                                                                   | 853/10000                                                                   | 950/500/300                                                          | <i>Adv Funct Mater</i> 2018 <sup>S16</sup>           |
| Co <sub>3</sub> O <sub>4</sub> /C nanofibers | Multistep       | 1173/50                                                                    | 607/3000                                                                    | 1121/50/100                                                          | <i>Adv Funct Mater</i> 2016 <sup>S17</sup>           |
| Co <sub>3</sub> O <sub>4</sub> /NC           | Multistep       | 1293/100                                                                   | 835/2000                                                                    | 798/1000/500                                                         | <i>J Mater Chem A</i> 2018 <sup>S18</sup>            |
| Co <sub>3</sub> O <sub>4</sub> /NC           | Multistep       | 1117/100                                                                   | 839/5000                                                                    | 892/100/100                                                          | <i>Nano Energy</i> 2015 <sup>S19</sup>               |
| Co <sub>3</sub> O <sub>4</sub> /NC           | Multistep       | 730/500                                                                    | 128/5000                                                                    | 612/1000/500                                                         | <i>J Mater Chem A</i> 2016 <sup>S20</sup>            |
| Co <sub>3</sub> O <sub>4</sub> /NC           | Multistep       | 818/100                                                                    | 529/5000                                                                    | 620/1000/2000                                                        | <i>ACS Appl Mater Interfaces</i> 2017 <sup>S21</sup> |
| Co <sub>3</sub> O <sub>4</sub> /CNT          | Multistep       | 1281/100                                                                   | 643/3000                                                                    | 782/1000/200                                                         | <i>Angew Chem Int Ed</i> 2016 <sup>S22</sup>         |
| Co <sub>3</sub> O <sub>4</sub> /graphene     | Multistep       | 2015/98                                                                    | 1134/2000                                                                   | 852/2000/2000                                                        | <i>Adv Energy Mater</i> 2016 <sup>S23</sup>          |
| Co <sub>3</sub> O <sub>4</sub> /N-graphene   | Multistep       | 1200/100                                                                   | 838/1000                                                                    | 812/1000/230                                                         | <i>Small</i> 2016 <sup>S24</sup>                     |
| Co <sub>3</sub> O <sub>4</sub> /RGO          | Multistep       | 1200/1000                                                                  | 842/10000                                                                   | 1156/2000/200                                                        | <i>Nano Energy</i> 2015 <sup>S25</sup>               |
| <b>CoO/C YSNSs</b>                           | <b>One-step</b> | <b>2050/100</b><br><b>1021/395</b>                                         | <b>748/790</b><br><b>398/3950</b>                                           | <b>1970/100/1000</b><br><b>680/1000/1000</b>                         | <b>This work</b>                                     |

Note: NC: N-doped carbon; BNG: B, N-doped graphitic; CNT: carbon nanotubes; GO: graphene oxides; RGO: reduced graphene oxide.

## Supplementary References

- S1. K. Cao, L. Jiao, Y. Liu, H. Liu, Y. Wang and H. Yuan, *Adv. Funct. Mater.*, 2015, **25**, 1082-1089.
- S2. G. Liu and J. Shao, *J. Mater. Chem. A*, 2017, **5**, 9801-9806.
- S3. F. F. Wu, S. S. Zhang, B. J. Xi, Z. Y. Feng, D. Sun, X. J. Ma, J. H. Zhang, J. K. Feng and S. L. Xiong, *Adv. Energy Mater.*, 2018, **8**, 8.
- S4. S. Wang, M. Chen, Y. Xie, Y. Fan, D. Wang, J.-J. Jiang, Y. Li, H. Grützmacher and C.-Y. Su, *Small*, 2016, **12**, 2365-2375.
- S5. X. Sun, G.-P. Hao, X. Lu, L. Xi, B. Liu, W. Si, C. Ma, Q. Liu, Q. Zhang, S. Kaskel and O. G. Schmidt, *J. Mater. Chem. A*, 2016, **4**, 10166-10173.
- S6. H. Tabassum, R. Zou, A. Mahmood, Z. Liang, Q. Wang, H. Zhang, S. Gao, C. Qu, W. Guo and S. Guo, *Adv. Mater.*, 2018, **30**, 1705441.
- S7. S. J. R. Prabakar, R. S. Babu, M. Oh, M. S. Lah, S. C. Han, J. Jeong and M. Pyo, *J. Power Sources*, 2014, **272**, 1037-1045.
- S8. M. Zhang, F. Yan, X. Tang, Q. Li, T. Wang and G. Cao, *J. Mater. Chem. A*, 2014, **2**, 5890-5897.
- S9. X.-L. Huang, R.-Z. Wang, D. Xu, Z.-L. Wang, H.-G. Wang, J.-J. Xu, Z. Wu, Q.-C. Liu, Y. Zhang and X.-B. Zhang, *Adv. Funct. Mater.*, 2013, **23**, 4345-4353.
- S10. K. Zhang, P. Li, M. Ma and J. H. Park, *Adv. Funct. Mater.*, 2016, **26**, 2959-2965.
- S11. J. Liu, Y. Xu, X. Ma, J. Feng, Y. Qian and S. Xiong, *Nano Energy*, 2014, **7**, 52-62.
- S12. J. Zhang, T. Huang and A. Yu, *J. Power Sources*, 2015, **273**, 894-903.
- S13. Y. Feng, X.-Y. Yu and U. Paik, *Chem. Commun.*, 2016, **52**, 6269-6272.
- S14. S. Zhu, J. Li, X. Deng, C. He, E. Liu, F. He, C. Shi and N. Zhao, *Adv. Funct. Mater.*, 2017, **27**, 1605017.

- S15. A. Li, M. Zhong, W. Shuang, C. Wang, J. Liu, Z. Chang and X.-H. Bu, *Inorg. Chem. Front.*, 2018, **5**, 1602-1608.
- S16. C. Yan, Y. Zhu, Y. Li, Z. Fang, L. Peng, X. Zhou, G. Chen and G. Yu, *Adv. Funct. Mater.*, 2018, **28**, 1705951.
- S17. C. Yan, G. Chen, X. Zhou, J. Sun and C. Lv, *Adv. Funct. Mater.*, 2016, **26**, 1428-1436.
- S18. H. Xue, Z. Na, Y. Wu, X. Wang, Q. Li, F. Liang, D. Yin, L. Wang and J. Ming, *J. Mater. Chem. A*, 2018, **6**, 12466-12474.
- S19. Y. Hou, J. Li, Z. Wen, S. Cui, C. Yuan and J. Chen, *Nano Energy*, 2015, **12**, 1-8.
- S20. X. Han, W.-M. Chen, X. Han, Y.-Z. Tan and D. Sun, *J. Mater. Chem. A*, 2016, **4**, 13040-13045.
- S21. W. Kang, Y. Zhang, L. Fan, L. Zhang, F. Dai, R. Wang and D. Sun, *ACS Appl. Mater. Interfaces*, 2017, **9**, 10602-10609.
- S22. Y. M. Chen, L. Yu and X. W. Lou, *Angew. Chem. Int. Ed.*, 2016, **55**, 5990-5993.
- S23. Y. Dou, J. Xu, B. Ruan, Q. Liu, Y. Pan, Z. Sun and S. X. Dou, *Adv. Energy Mater.*, 2016, **6**, 1501835.
- S24. X. Yao, G. Guo, Y. Zhao, Y. Zhang, S. Y. Tan, Y. Zeng, R. Zou, Q. Yan and Y. Zhao, *Small*, 2016, **12**, 3849-3860.
- S25. G. D. Park, J. S. Cho and Y. C. Kang, *Nano Energy*, 2015, **17**, 17-26.
